# Supplementary figures and images for: Co-Infection of Oral Candida albicans and Porphyromonas gingivalis Is Associated with Active Periodontitis in Middle-Aged and Older Japanese People
Source: MDPI journal article supplement (doi:10.3390/medicina58060723), 2022-05-28

Supplementary figure S1

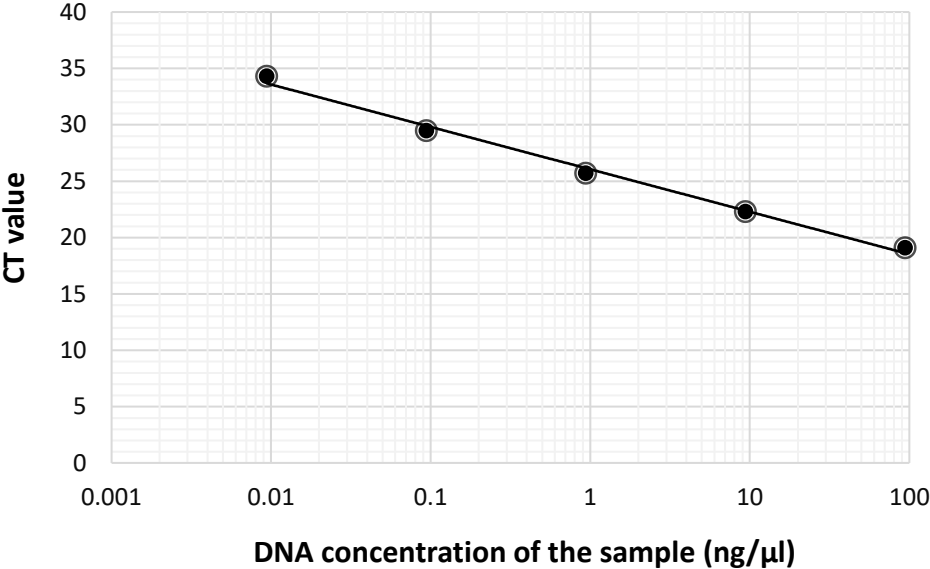

Supplement: s1 [file s1]
